# Supplementary material
Source: Copernicus journal article supplement (doi:10.5194/jm-45-415-2026)
Supplement: Supplementary file [file jm-45-415-2026-supplement-title-page.pdf › jm-45-415-2026-supplement-title-page.pdf]

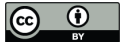

## *Supplement of*

# **First report of modern planktonic foraminifera in the southeastern Arabian Gulf, with observations on the morphology and ecology of *Neogallitellia vivans* (Cushman)**

**Sinatrya D. Prayudi et al.**

*Correspondence to:* Michael A. Kaminski ([kaminski@kfupm.edu.sa](mailto:kaminski@kfupm.edu.sa))

- [jm-45-415-2026-supplement-title-page.pdf](#)
- Supplementary Material SEM High Quality N. vivans FINAL
  - Sample S1a.tif
  - Sample S1b.tif
  - Sample S1c.tif
  - Sample S1d.tif
  - Sample S1e.tif
  - Sample S1f.tif
  - Sample S2a.tif
  - Sample S2b.tif
  - Sample S2c.tif
  - Sample S3a.tif
  - Sample S3b.tif
  - Sample S3c.tif
  - Sample S4a.tif
  - Sample S4b.tif
  - Sample S4c.tif
  - Sample S5a.tif
  - Sample S5b.tif
  - Sample S5c.tif

The copyright of individual parts of the supplement might differ from the article licence.
